# Supplementary material
Source: PubMed Central journal article supplement (PMC8006066)
Supplement: NIHMS1664412-supplement-1.pdf [file NIHMS1664412-supplement-1.pdf]

ONLINE REPOSITORY

TABLE E1. Search strategy

| PubMed |                                                                                                                                                                                                                                                                                                                                                                                                                                                                                                                                                                                                                                                                                                                                                                                                                                                                                                                                                                                                                                                                                                                                                                                                                                                                                                                                                                                                                                                                                                                                                                                                                                                                                                                                                                                                                                                                                                                                                                                                                                                                                                                                                                                                                                                                                                                                                                                                                                                                                                                                                                                                                                                                                                                                                                                                                                                                                                                                                                                                                                                                                                                                                                                                                                                                                                                                                                                                                                                                                                                                                                                                                                                                                                                                                                                                                                                                                                                                                                                                                                                                                                                                                                                                                  |           |
|--------|------------------------------------------------------------------------------------------------------------------------------------------------------------------------------------------------------------------------------------------------------------------------------------------------------------------------------------------------------------------------------------------------------------------------------------------------------------------------------------------------------------------------------------------------------------------------------------------------------------------------------------------------------------------------------------------------------------------------------------------------------------------------------------------------------------------------------------------------------------------------------------------------------------------------------------------------------------------------------------------------------------------------------------------------------------------------------------------------------------------------------------------------------------------------------------------------------------------------------------------------------------------------------------------------------------------------------------------------------------------------------------------------------------------------------------------------------------------------------------------------------------------------------------------------------------------------------------------------------------------------------------------------------------------------------------------------------------------------------------------------------------------------------------------------------------------------------------------------------------------------------------------------------------------------------------------------------------------------------------------------------------------------------------------------------------------------------------------------------------------------------------------------------------------------------------------------------------------------------------------------------------------------------------------------------------------------------------------------------------------------------------------------------------------------------------------------------------------------------------------------------------------------------------------------------------------------------------------------------------------------------------------------------------------------------------------------------------------------------------------------------------------------------------------------------------------------------------------------------------------------------------------------------------------------------------------------------------------------------------------------------------------------------------------------------------------------------------------------------------------------------------------------------------------------------------------------------------------------------------------------------------------------------------------------------------------------------------------------------------------------------------------------------------------------------------------------------------------------------------------------------------------------------------------------------------------------------------------------------------------------------------------------------------------------------------------------------------------------------------------------------------------------------------------------------------------------------------------------------------------------------------------------------------------------------------------------------------------------------------------------------------------------------------------------------------------------------------------------------------------------------------------------------------------------------------------------------------------|-----------|
| No.    | Query                                                                                                                                                                                                                                                                                                                                                                                                                                                                                                                                                                                                                                                                                                                                                                                                                                                                                                                                                                                                                                                                                                                                                                                                                                                                                                                                                                                                                                                                                                                                                                                                                                                                                                                                                                                                                                                                                                                                                                                                                                                                                                                                                                                                                                                                                                                                                                                                                                                                                                                                                                                                                                                                                                                                                                                                                                                                                                                                                                                                                                                                                                                                                                                                                                                                                                                                                                                                                                                                                                                                                                                                                                                                                                                                                                                                                                                                                                                                                                                                                                                                                                                                                                                                            | Results   |
| #1     | ("asthma"[MeSH Terms] OR asthma[tiab] OR asthmatic[tiab]) NOT (("Adolescent"[Mesh] OR "Child"[Mesh] OR "Infant"[Mesh]) NOT "Adult"[Mesh])                                                                                                                                                                                                                                                                                                                                                                                                                                                                                                                                                                                                                                                                                                                                                                                                                                                                                                                                                                                                                                                                                                                                                                                                                                                                                                                                                                                                                                                                                                                                                                                                                                                                                                                                                                                                                                                                                                                                                                                                                                                                                                                                                                                                                                                                                                                                                                                                                                                                                                                                                                                                                                                                                                                                                                                                                                                                                                                                                                                                                                                                                                                                                                                                                                                                                                                                                                                                                                                                                                                                                                                                                                                                                                                                                                                                                                                                                                                                                                                                                                                                        | 124,059   |
| #2     | "Patient Compliance"[Mesh] OR "Medication Adherence"[tiab] OR "Medication Compliance"[tiab] OR "Medication nonadherence"[tiab] OR "Medication non adherence"[tiab] OR "Medication Noncompliance"[tiab] OR "Medication non compliance"[tiab] OR "Medication Compliance"[tiab] OR "Medication Persistence"[tiab] OR "Health Knowledge, Attitudes, Practice"[Mesh]                                                                                                                                                                                                                                                                                                                                                                                                                                                                                                                                                                                                                                                                                                                                                                                                                                                                                                                                                                                                                                                                                                                                                                                                                                                                                                                                                                                                                                                                                                                                                                                                                                                                                                                                                                                                                                                                                                                                                                                                                                                                                                                                                                                                                                                                                                                                                                                                                                                                                                                                                                                                                                                                                                                                                                                                                                                                                                                                                                                                                                                                                                                                                                                                                                                                                                                                                                                                                                                                                                                                                                                                                                                                                                                                                                                                                                                  | 149,914   |
| #3     | ("Administration, Inhalation"[Mesh] OR "Nebulizers and Vaporizers"[Mesh] OR inhaler[tiab] OR inhalers[tiab] OR asthma treatment*[tiab] OR "asthma medication"[tiab] OR "asthma medications"[tiab] OR "controller medication"[tiab] OR "controller medications"[tiab] OR asthma control*[tiab] OR "asthma management"[tiab] OR antiasthmatic[tiab] OR antiasthmatics[tiab] OR "anti asthmatic"[tiab] OR "anti asthmatics"[tiab] OR "asthma drug"[tiab] OR "asthma drugs"[tiab] OR "controller drug"[tiab] OR "controller drugs"[tiab] OR "Anti-Asthmatic Agents"[Pharmacological Action] OR "Anti-Asthmatic Agents"[Mesh] OR "accolate"[tiab] OR "advair"[tiab] OR "aerobid"[tiab] OR "albuterol"[Mesh] OR "albuterol"[tiab] OR "aminophylline"[Mesh] OR "aminophylline"[tiab] OR "arformoterol"[tiab] OR "asmanex"[tiab] OR "azmacort"[tiab] OR "beclomethasone"[Mesh] OR "beclomethasone"[tiab] OR "benralizumab"[Supplementary Concept] OR "benralizumab"[tiab] OR "brethine"[tiab] OR "budesonide"[Mesh] OR "budesonide"[tiab] OR "budesonide, formoterol fumarate drug combination"[Mesh] OR "cromolyn sodium"[Mesh] OR "cromolyn"[tiab] OR "daliresp"[tiab] OR "deltasona"[tiab] OR "dexamethasone"[Mesh] OR "dexamethasone"[tiab] OR "dulera"[tiab] OR "dupilumab"[tiab] OR "elixophyllin"[tiab] OR "flovent"[tiab] OR "flunisolide"[Supplementary Concept] OR "flunisolide"[tiab] OR "fluticasone propionate, salmeterol xinafoate drug combination"[Mesh] OR "fluticasone"[Mesh] OR "fluticasone"[tiab] OR "foradil"[tiab] OR "formoterol fumarate"[Mesh] OR "formoterol"[tiab] OR "indacaterol"[Supplementary Concept] OR "indacaterol"[tiab] OR "intal"[tiab] OR "lebrizumab"[Supplementary Concept] OR "lebrizumab"[tiab] OR "levalbuterol"[Mesh] OR "levalbuterol"[tiab] OR "maxair"[tiab] OR "medrol"[tiab] OR "mepolizumab"[Supplementary Concept] OR "mepolizumab"[tiab] OR "methylprednisolone"[Mesh] OR "methylprednisolone"[tiab] OR "mometasone furoate"[Mesh] OR "mometasone furoate, formoterol fumarate drug combination"[Mesh] OR "mometasone"[tiab] OR "montelukast"[Supplementary Concept] OR "montelukast"[tiab] OR "nedocromil"[Mesh] OR "nedocromil"[tiab] OR "olodaterol"[Supplementary Concept] OR "olodaterol"[tiab] OR "omalizumab"[Mesh] OR "omalizumab"[tiab] OR "onbrez"[tiab] OR "pediapred"[tiab] OR "pirbuterol"[Supplementary Concept] OR "pirbuterol"[tiab] OR "prednisolone phosphate"[Supplementary Concept] OR "prednisolone"[Mesh] OR "prednisolone"[tiab] OR "prednisone"[Mesh] OR "prednisone"[tiab] OR "proair"[tiab] OR "procaterol"[Mesh] OR "procaterol"[tiab] OR "proventil"[tiab] OR "pulmicort"[tiab] OR "qvar"[tiab] OR "Roflumilast"[Supplementary Concept] OR "Roflumilast"[tiab] OR "salmeterol xinafoate"[Mesh] OR "salmeterol"[tiab] OR "SAR231893"[Supplementary Concept] OR "SAR231893"[tiab] OR "serevent"[tiab] OR "singulair"[tiab] OR "spiriva"[tiab] OR "symbicort"[tiab] OR "terbutaline"[Mesh] OR "terbutaline"[tiab] OR "theolair"[tiab] OR "theophylline"[Mesh] OR "theophylline"[tiab] OR "tilade"[tiab] OR "tiotropium bromide"[Mesh] OR "tiotropium"[tiab] OR "tralokinumab"[Supplementary Concept] OR "tralokinumab"[tiab] OR "triamcinolone acetonide"[Mesh] OR "triamcinolone"[Mesh] OR "triamcinolone"[tiab] OR "uniphyll"[tiab] OR "ventolin"[tiab] OR "vilanterol"[Supplementary Concept] OR "vilanterol"[tiab] OR "xolair"[tiab] OR "xopenex"[tiab] OR "zafirlukast"[Supplementary Concept] OR "zafirlukast"[tiab] OR "zileuton"[Supplementary Concept] OR "zileuton"[tiab] OR "zyflo"[tiab]) AND ("Patient Acceptance of Health Care"[Mesh] OR adhere*[tiab] OR nonadhere*[tiab] OR non adhere*[tiab] OR comply[tiab] OR complian*[tiab] OR noncomplian*[tiab] OR non complian*[tiab] OR satisfaction[tiab] OR participation[tiab] OR acceptance[tiab] OR preference*[tiab] OR attitude*[tiab] OR self-manage*[tiab] OR barrier [tiab] OR barriers[tiab] OR belief[tiab] OR beliefs[tiab] OR enable*[tiab] OR facilitate*[tiab] OR "Perception"[Mesh] OR perception[tiab] OR perceptions[tiab] OR perceive[tiab] OR perceived[tiab] OR misperception[tiab] OR misperceptions [tiab] OR misperceive[tiab] OR misperceived[tiab]) | 27,056    |
| #4     | #1 AND (#2 OR #3)                                                                                                                                                                                                                                                                                                                                                                                                                                                                                                                                                                                                                                                                                                                                                                                                                                                                                                                                                                                                                                                                                                                                                                                                                                                                                                                                                                                                                                                                                                                                                                                                                                                                                                                                                                                                                                                                                                                                                                                                                                                                                                                                                                                                                                                                                                                                                                                                                                                                                                                                                                                                                                                                                                                                                                                                                                                                                                                                                                                                                                                                                                                                                                                                                                                                                                                                                                                                                                                                                                                                                                                                                                                                                                                                                                                                                                                                                                                                                                                                                                                                                                                                                                                                | 5,196     |
| #5     | "Focus Groups"[Mesh] OR "Qualitative research"[Mesh] OR "Observational Study"[Publication Type] OR "Observational Studies as Topic"[Mesh] OR "Interview"[Publication Type] OR "personal narratives as topic"[Mesh] OR "interviews as topic"[Mesh] OR "Narration"[Mesh] OR "Nursing Research"[Mesh] OR "Anecdotes as Topic"[Mesh] OR "Tape Recording"[Mesh] OR "semi-structured"[tiab] OR semistructured[tiab] OR unstructured[tiab] OR informal[tiab] OR "in-depth"[tiab] OR indepth[tiab] OR "face-to-face"[tiab] OR structured[tiab] OR interview*[tiab] OR discussion[tiab] OR discussions[tiab] OR "focus group"[tiab] OR "focus groups"[tiab] OR qualitative[tiab] OR ethnography[tiab] OR ethnographic[tiab] OR fieldwork[tiab] OR "field work"[tiab] OR "key informant"[tiab] OR questionnaire[tiab] OR questionnaires[tiab] OR survey[tiab] OR surveys[tiab] OR surveyed[tiab] OR open-ended question*[tiab] OR "thematic analysis"[tiab] OR workshop[tiab] OR workshops[tiab]                                                                                                                                                                                                                                                                                                                                                                                                                                                                                                                                                                                                                                                                                                                                                                                                                                                                                                                                                                                                                                                                                                                                                                                                                                                                                                                                                                                                                                                                                                                                                                                                                                                                                                                                                                                                                                                                                                                                                                                                                                                                                                                                                                                                                                                                                                                                                                                                                                                                                                                                                                                                                                                                                                                                                                                                                                                                                                                                                                                                                                                                                                                                                                                                                           | 1,517,082 |

(continued)

TABLE E1. (Continued)

| PubMed |                                                                                                                                                                                                                                                                                                                                                                                                                                                                                                                                                                                                                                                                                                                                                                                                                                                                                                                                                                                                                                                                                                                                                                                                                                                                                                                                                                                                                                                                                                                                                                                                                                                                                                                                                                                                                                                                                                                                                                                                                                                                                                                                                                                                                                                                                                                                                                                                                                                                                                                                                                                                                                                                                      |           |
|--------|--------------------------------------------------------------------------------------------------------------------------------------------------------------------------------------------------------------------------------------------------------------------------------------------------------------------------------------------------------------------------------------------------------------------------------------------------------------------------------------------------------------------------------------------------------------------------------------------------------------------------------------------------------------------------------------------------------------------------------------------------------------------------------------------------------------------------------------------------------------------------------------------------------------------------------------------------------------------------------------------------------------------------------------------------------------------------------------------------------------------------------------------------------------------------------------------------------------------------------------------------------------------------------------------------------------------------------------------------------------------------------------------------------------------------------------------------------------------------------------------------------------------------------------------------------------------------------------------------------------------------------------------------------------------------------------------------------------------------------------------------------------------------------------------------------------------------------------------------------------------------------------------------------------------------------------------------------------------------------------------------------------------------------------------------------------------------------------------------------------------------------------------------------------------------------------------------------------------------------------------------------------------------------------------------------------------------------------------------------------------------------------------------------------------------------------------------------------------------------------------------------------------------------------------------------------------------------------------------------------------------------------------------------------------------------------|-----------|
| No.    | Query                                                                                                                                                                                                                                                                                                                                                                                                                                                                                                                                                                                                                                                                                                                                                                                                                                                                                                                                                                                                                                                                                                                                                                                                                                                                                                                                                                                                                                                                                                                                                                                                                                                                                                                                                                                                                                                                                                                                                                                                                                                                                                                                                                                                                                                                                                                                                                                                                                                                                                                                                                                                                                                                                | Results   |
| #6     | #4 AND #5                                                                                                                                                                                                                                                                                                                                                                                                                                                                                                                                                                                                                                                                                                                                                                                                                                                                                                                                                                                                                                                                                                                                                                                                                                                                                                                                                                                                                                                                                                                                                                                                                                                                                                                                                                                                                                                                                                                                                                                                                                                                                                                                                                                                                                                                                                                                                                                                                                                                                                                                                                                                                                                                            | 1,914     |
| #7     | #6 AND English[lang] NOT (animals[mh] NOT humans[mh]) NOT (Editorial[ptyp] OR Letter[ptyp] OR Case Reports[ptyp] OR Comment[ptyp])                                                                                                                                                                                                                                                                                                                                                                                                                                                                                                                                                                                                                                                                                                                                                                                                                                                                                                                                                                                                                                                                                                                                                                                                                                                                                                                                                                                                                                                                                                                                                                                                                                                                                                                                                                                                                                                                                                                                                                                                                                                                                                                                                                                                                                                                                                                                                                                                                                                                                                                                                   | 1,757     |
| EMBASE |                                                                                                                                                                                                                                                                                                                                                                                                                                                                                                                                                                                                                                                                                                                                                                                                                                                                                                                                                                                                                                                                                                                                                                                                                                                                                                                                                                                                                                                                                                                                                                                                                                                                                                                                                                                                                                                                                                                                                                                                                                                                                                                                                                                                                                                                                                                                                                                                                                                                                                                                                                                                                                                                                      |           |
| No.    | Query                                                                                                                                                                                                                                                                                                                                                                                                                                                                                                                                                                                                                                                                                                                                                                                                                                                                                                                                                                                                                                                                                                                                                                                                                                                                                                                                                                                                                                                                                                                                                                                                                                                                                                                                                                                                                                                                                                                                                                                                                                                                                                                                                                                                                                                                                                                                                                                                                                                                                                                                                                                                                                                                                | Results   |
| #1     | 'asthma'/exp OR asthma:ti,ab OR asthmatic:ti,ab AND [adult]/lim                                                                                                                                                                                                                                                                                                                                                                                                                                                                                                                                                                                                                                                                                                                                                                                                                                                                                                                                                                                                                                                                                                                                                                                                                                                                                                                                                                                                                                                                                                                                                                                                                                                                                                                                                                                                                                                                                                                                                                                                                                                                                                                                                                                                                                                                                                                                                                                                                                                                                                                                                                                                                      | 59,031    |
| #2     | 'patient compliance'/exp OR 'medication adherence':ti,ab OR 'medication compliance':ti,ab OR 'medication nonadherence':ti,ab OR 'medication non adherence':ti,ab OR 'medication noncompliance':ti,ab OR 'medication non compliance':ti,ab OR 'medication compliance':ti,ab OR 'medication persistence':ti,ab OR 'adherence to therapy':ti,ab OR 'adherence to treatment':ti,ab OR 'compliance to therapy':ti,ab OR 'compliance to treatment':ti,ab OR 'patient adherence':ti,ab OR 'patients adherence':ti,ab OR 'therapy adherence':ti,ab OR 'therapy compliance':ti,ab OR 'treatment adherence':ti,ab OR 'treatment compliance':ti,ab OR 'attitude to health'/exp                                                                                                                                                                                                                                                                                                                                                                                                                                                                                                                                                                                                                                                                                                                                                                                                                                                                                                                                                                                                                                                                                                                                                                                                                                                                                                                                                                                                                                                                                                                                                                                                                                                                                                                                                                                                                                                                                                                                                                                                                  | 222,254   |
| #3     | ('inhaler'/exp OR inhaler:ti,ab OR inhalers:ti,ab OR 'asthma treatment':ti,ab OR 'asthma treatments':ti,ab OR 'asthma medication':ti,ab OR 'asthma medications':ti,ab OR 'controller medication':ti,ab OR 'controller medications':ti,ab OR 'asthma control*':ti,ab OR 'asthma management':ti,ab OR 'antiasthmatic':ti,ab OR 'antiasthmatics':ti,ab OR 'anti asthmatic':ti,ab OR 'anti asthmatics':ti,ab OR 'asthma drug':ti,ab OR 'asthma drugs':ti,ab OR 'controller drug':ti,ab OR 'controller drugs':ti,ab OR 'antiasthmatic agent'/exp OR 'accolate':ti,ab OR 'advair':ti,ab OR 'aerobid':ti,ab OR 'albuterol':ti,ab OR 'aminophylline':ti,ab OR 'arformoterol':ti,ab OR 'asmanex':ti,ab OR 'azmacort':ti,ab OR 'beclomethasone':ti,ab OR 'benralizumab':ti,ab OR 'brethine':ti,ab OR 'budesonide':ti,ab OR 'cromolyn':ti,ab OR 'daliresp':ti,ab OR 'deltasone':ti,ab OR 'dexamethasone':ti,ab OR 'dulera':ti,ab OR 'duplumab':ti,ab OR 'elixophyllin':ti,ab OR 'flovent':ti,ab OR 'flunisolide':ti,ab OR 'fluticasone':ti,ab OR 'foradil':ti,ab OR 'formoterol':ti,ab OR 'indacaterol':ti,ab OR 'intal':ti,ab OR 'lebrizumab':ti,ab OR 'levalbuterol':ti,ab OR 'maxair':ti,ab OR 'medrol':ti,ab OR 'mepolizumab':ti,ab OR 'methylprednisolone':ti,ab OR 'mometasone':ti,ab OR 'montelukast':ti,ab OR 'nedocromil':ti,ab OR 'olodaterol':ti,ab OR 'omalizumab':ti,ab OR 'onbrez':ti,ab OR 'pediapred':ti,ab OR 'pirbuterol':ti,ab OR 'prednisolone':ti,ab OR 'prednisone':ti,ab OR 'proair':ti,ab OR 'procatrol':ti,ab OR 'proventil':ti,ab OR 'pulmicort':ti,ab OR 'qvar':ti,ab OR 'Roflumilast':ti,ab OR 'salmeterol':ti,ab OR 'SAR231893':ti,ab OR 'serevent':ti,ab OR 'singulair':ti,ab OR 'spiriva':ti,ab OR 'symbicort':ti,ab OR 'terbutaline':ti,ab OR 'theolair':ti,ab OR 'theophylline':ti,ab OR 'tilade':ti,ab OR 'tiotropium':ti,ab OR 'tralokinumab':ti,ab OR 'triamcinolone':ti,ab OR 'uniphyll':ti,ab OR 'ventolin':ti,ab OR 'vilanterol':ti,ab OR 'xolair':ti,ab OR 'xopenex':ti,ab OR 'zafirlukast':ti,ab OR 'zileuton':ti,ab OR 'zyflo':ti,ab) AND ('patient attitude'/exp OR adhere*:ti,ab OR nonadhere*:ti,ab OR non adhere*:ti,ab OR comply:ti,ab OR complian*:ti,ab OR noncompliant*:ti,ab OR non compliant*:ti,ab OR satisfaction:ti,ab OR participation:ti,ab OR acceptance:ti,ab OR preference*:ti,ab OR attitude*:ti,ab OR 'self-manage*':ti,ab OR barrier:ti,ab OR barriers:ti,ab OR belief:ti,ab OR beliefs:ti,ab OR enable*:ti,ab OR facilitate*:ti,ab OR 'perception'/exp OR perception:ti,ab OR perceptions:ti,ab OR perceive:ti,ab OR perceived:ti,ab OR misperception:ti,ab OR misperceptions:ti,ab OR misperceive:ti,ab OR misperceived:ti,ab) | 32,798    |
| #4     | #1 AND (#2 OR #3)                                                                                                                                                                                                                                                                                                                                                                                                                                                                                                                                                                                                                                                                                                                                                                                                                                                                                                                                                                                                                                                                                                                                                                                                                                                                                                                                                                                                                                                                                                                                                                                                                                                                                                                                                                                                                                                                                                                                                                                                                                                                                                                                                                                                                                                                                                                                                                                                                                                                                                                                                                                                                                                                    | 4,320     |
| #5     | 'qualitative research'/exp OR 'observational study'/exp OR 'observational method'/exp OR 'questionnaire'/exp OR 'interview'/exp OR 'verbal communication'/exp OR 'thematic analysis'/exp OR 'recording'/exp OR 'semi-structured':ti,ab OR semistructured:ti,ab OR unstructured:ti,ab OR informal:ti,ab OR 'in-depth':ti,ab OR indepth:ti,ab OR 'face-to-face':ti,ab OR structured:ti,ab OR interview*:ti,ab OR discussion:ti,ab OR discussions:ti,ab OR 'focus group':ti,ab OR 'focus groups':ti,ab OR qualitative:ti,ab OR ethnography:ti,ab OR ethnographic:ti,ab OR fieldwork:ti,ab OR 'field work':ti,ab OR 'key informant':ti,ab OR questionnaire:ti,ab OR questionnaires:ti,ab OR survey:ti,ab OR surveys:ti,ab OR surveyed:ti,ab OR 'open-ended question*':ti,ab OR 'thematic analysis':ti,ab OR workshop:ti,ab OR workshops:ti,ab                                                                                                                                                                                                                                                                                                                                                                                                                                                                                                                                                                                                                                                                                                                                                                                                                                                                                                                                                                                                                                                                                                                                                                                                                                                                                                                                                                                                                                                                                                                                                                                                                                                                                                                                                                                                                                            | 2,432,939 |
| #5     | #3 AND #4                                                                                                                                                                                                                                                                                                                                                                                                                                                                                                                                                                                                                                                                                                                                                                                                                                                                                                                                                                                                                                                                                                                                                                                                                                                                                                                                                                                                                                                                                                                                                                                                                                                                                                                                                                                                                                                                                                                                                                                                                                                                                                                                                                                                                                                                                                                                                                                                                                                                                                                                                                                                                                                                            | 2,076     |

(continued)

TABLE E1. (Continued)

| EMBASE         |                                                                                                                                                                                                                                                                                                                                                                                                                                                                                                                                                                                                                                                                                                                                                                                                                                                                                                                                                                                                                                                                                                                                                                                                                                                                                                                                                                                                                                                                                                                                                                                                                                                                                                                                                                                                                                                                    |           |
|----------------|--------------------------------------------------------------------------------------------------------------------------------------------------------------------------------------------------------------------------------------------------------------------------------------------------------------------------------------------------------------------------------------------------------------------------------------------------------------------------------------------------------------------------------------------------------------------------------------------------------------------------------------------------------------------------------------------------------------------------------------------------------------------------------------------------------------------------------------------------------------------------------------------------------------------------------------------------------------------------------------------------------------------------------------------------------------------------------------------------------------------------------------------------------------------------------------------------------------------------------------------------------------------------------------------------------------------------------------------------------------------------------------------------------------------------------------------------------------------------------------------------------------------------------------------------------------------------------------------------------------------------------------------------------------------------------------------------------------------------------------------------------------------------------------------------------------------------------------------------------------------|-----------|
| No.            | Query                                                                                                                                                                                                                                                                                                                                                                                                                                                                                                                                                                                                                                                                                                                                                                                                                                                                                                                                                                                                                                                                                                                                                                                                                                                                                                                                                                                                                                                                                                                                                                                                                                                                                                                                                                                                                                                              | Results   |
| #6             | #5 AND [english]/lim AND [humans]/lim                                                                                                                                                                                                                                                                                                                                                                                                                                                                                                                                                                                                                                                                                                                                                                                                                                                                                                                                                                                                                                                                                                                                                                                                                                                                                                                                                                                                                                                                                                                                                                                                                                                                                                                                                                                                                              | 1,912     |
| #7             | #6 NOT ('case report'/exp OR 'a case report':ti OR ': case report':ti OR 'case study'/exp OR 'editorial'/exp OR 'letter'/exp OR 'note'/exp OR [editorial]/lim OR [letter]/lim OR [note]/lim)                                                                                                                                                                                                                                                                                                                                                                                                                                                                                                                                                                                                                                                                                                                                                                                                                                                                                                                                                                                                                                                                                                                                                                                                                                                                                                                                                                                                                                                                                                                                                                                                                                                                       | 1,871     |
| Web of Science |                                                                                                                                                                                                                                                                                                                                                                                                                                                                                                                                                                                                                                                                                                                                                                                                                                                                                                                                                                                                                                                                                                                                                                                                                                                                                                                                                                                                                                                                                                                                                                                                                                                                                                                                                                                                                                                                    |           |
| Set            | Search                                                                                                                                                                                                                                                                                                                                                                                                                                                                                                                                                                                                                                                                                                                                                                                                                                                                                                                                                                                                                                                                                                                                                                                                                                                                                                                                                                                                                                                                                                                                                                                                                                                                                                                                                                                                                                                             | Results   |
| #1             | TS=(asthma OR asthmatic)                                                                                                                                                                                                                                                                                                                                                                                                                                                                                                                                                                                                                                                                                                                                                                                                                                                                                                                                                                                                                                                                                                                                                                                                                                                                                                                                                                                                                                                                                                                                                                                                                                                                                                                                                                                                                                           | 164,711   |
| #2             | TS=("patient compliance" OR "medication adherence" OR "medication compliance" OR "medication nonadherence" OR "medication non adherence" OR "medication noncompliance" OR "medication non compliance" OR "medication compliance" OR "medication persistence" OR "adherence to therapy" OR "adherence to treatment" OR "compliance to therapy" OR "compliance to treatment" OR "patient adherence" OR "patients adherence" OR "therapy adherence" OR "therapy compliance" OR "treatment adherence" OR "treatment compliance" OR "attitude to health")                                                                                                                                                                                                                                                                                                                                                                                                                                                                                                                                                                                                                                                                                                                                                                                                                                                                                                                                                                                                                                                                                                                                                                                                                                                                                                               | 31,306    |
| #3             | TS=(inhaler OR inhalers OR "asthma treatment" OR "asthma treatments" OR "asthma medication" OR "asthma medications" OR "asthma drug" OR "asthma drugs" OR "controller drug" OR "controller drugs" OR "controller medication" OR "controller medications" OR "asthma control" OR "asthma management" OR antiasthmatic OR antiasthmatics OR "anti asthmatic" OR "anti asthmatics" OR accolate OR advair OR aerobid OR albuterol OR aminophylline OR arformoterol OR asmanex OR azmacort OR beclomethasone OR benralizumab OR brethine OR budesonide OR cromolyn OR daliresp OR deltasone OR dexamethasone OR dulera OR dupilumab OR elixophyllin OR flovent OR flunisolide OR fluticasone OR foradil OR formoterol OR indacaterol OR intal OR lebrizumab OR levalbuterol OR maxair OR medrol OR mepolizumab OR methylprednisolone OR mometasone OR montelukast OR nedocromil OR olodaterol OR omalizumab OR onbrez OR pediapred OR pirbuterol OR prednisolone OR prednisone OR proair OR procaterol OR proventil OR pulmicort OR qvar OR Roflumilast OR salmeterol OR SAR231893 OR serevent OR singulair OR spiriva OR symbicort OR terbutaline OR theolair OR theophylline OR tilade OR tiotropium OR tralokinumab OR triamcinolone OR uniphyll OR ventolin OR vilanterol OR xolair OR xopenex OR zafirlukast OR zileuton OR zyflo) AND TS=("patient attitude" OR adherence OR nonadherence OR "non adherence" OR comply OR compliance OR noncompliance OR "non compliance" OR satisfaction OR participation OR acceptance OR preference OR preferences OR attitude OR attitudes OR "self-management" OR barrier OR barriers OR belief OR beliefs OR enable OR enables OR enabler OR enablers OR facilitate OR facilitates OR facilitators OR perception OR perceptions OR perceive OR perceived OR misperception OR misperceptions OR misperceive OR misperceived) | 12,458    |
| #4             | #1 AND (#2 OR #3)                                                                                                                                                                                                                                                                                                                                                                                                                                                                                                                                                                                                                                                                                                                                                                                                                                                                                                                                                                                                                                                                                                                                                                                                                                                                                                                                                                                                                                                                                                                                                                                                                                                                                                                                                                                                                                                  | 5,283     |
| #5             | TS=(qualitative OR "observational study" OR "observational method" OR "thematic analysis" OR "semi-structured" OR semistructured OR unstructured OR informal OR "in-depth" OR indepth OR "face-to-face" OR structured OR interview OR interviews OR discussion OR discussions OR "focus group" OR "focus groups" OR ethnography OR ethnographic OR fieldwork OR "field work" OR "key informant" OR questionnaire OR questionnaires OR survey OR surveys OR surveyed OR workshop OR workshops)                                                                                                                                                                                                                                                                                                                                                                                                                                                                                                                                                                                                                                                                                                                                                                                                                                                                                                                                                                                                                                                                                                                                                                                                                                                                                                                                                                      | 6,671,901 |
| #5             | (#3 AND #4) AND TS=(Adult OR Adults)                                                                                                                                                                                                                                                                                                                                                                                                                                                                                                                                                                                                                                                                                                                                                                                                                                                                                                                                                                                                                                                                                                                                                                                                                                                                                                                                                                                                                                                                                                                                                                                                                                                                                                                                                                                                                               | 1,331     |
| #6             | #5 AND LANGUAGE: (English) DOCUMENT TYPES: (Article OR Meeting Abstract OR Review)                                                                                                                                                                                                                                                                                                                                                                                                                                                                                                                                                                                                                                                                                                                                                                                                                                                                                                                                                                                                                                                                                                                                                                                                                                                                                                                                                                                                                                                                                                                                                                                                                                                                                                                                                                                 | 600       |
| CINAHL         |                                                                                                                                                                                                                                                                                                                                                                                                                                                                                                                                                                                                                                                                                                                                                                                                                                                                                                                                                                                                                                                                                                                                                                                                                                                                                                                                                                                                                                                                                                                                                                                                                                                                                                                                                                                                                                                                    |           |
| No.            | Query                                                                                                                                                                                                                                                                                                                                                                                                                                                                                                                                                                                                                                                                                                                                                                                                                                                                                                                                                                                                                                                                                                                                                                                                                                                                                                                                                                                                                                                                                                                                                                                                                                                                                                                                                                                                                                                              | Results   |
| S1             | (MH "Asthma+") OR TI (asthma OR asthmatic) OR AB (asthma OR asthmatic)                                                                                                                                                                                                                                                                                                                                                                                                                                                                                                                                                                                                                                                                                                                                                                                                                                                                                                                                                                                                                                                                                                                                                                                                                                                                                                                                                                                                                                                                                                                                                                                                                                                                                                                                                                                             | 32,896    |
| S2             | (MH "Medication Compliance") OR TI ("medication adherence" OR "medication compliance" OR "medication nonadherence" OR "medication non adherence" OR "medication noncompliance" OR "medication non compliance" OR "medication compliance" OR "medication persistence" OR "adherence to therapy" OR "adherence to treatment" OR "compliance to therapy" OR "compliance to treatment" OR "patient adherence" OR "patients adherence" OR "therapy adherence" OR "therapy compliance" OR "treatment adherence" OR "treatment compliance") OR AB ("medication adherence" OR "medication compliance" OR "medication nonadherence" OR "medication non adherence" OR "medication noncompliance" OR "medication non compliance" OR "medication compliance" OR "medication persistence" OR "adherence to therapy" OR "adherence to treatment" OR "compliance to therapy" OR "compliance to treatment" OR "patient adherence" OR "patients adherence" OR "therapy adherence" OR "therapy compliance" OR "treatment adherence" OR "treatment compliance")                                                                                                                                                                                                                                                                                                                                                                                                                                                                                                                                                                                                                                                                                                                                                                                                                       | 18,985    |

(continued)

TABLE E1. (Continued)

| CINAHL |                                                                                                                                                                                                                                                                                                                                                                                                                                                                                                                                                                                                                                                                                                                                                                                                                                                                                                                                                                                                                                                                                                                                                                                                                                                                                                                                                                                                                                                                                                                                                                                                                                                                                                                                                                                                                                                                                                                                                                                                                                                                                                                                                                                                                                                                                                                                                                                                                                                                                                                                                                                                                                                                                                                |         |
|--------|----------------------------------------------------------------------------------------------------------------------------------------------------------------------------------------------------------------------------------------------------------------------------------------------------------------------------------------------------------------------------------------------------------------------------------------------------------------------------------------------------------------------------------------------------------------------------------------------------------------------------------------------------------------------------------------------------------------------------------------------------------------------------------------------------------------------------------------------------------------------------------------------------------------------------------------------------------------------------------------------------------------------------------------------------------------------------------------------------------------------------------------------------------------------------------------------------------------------------------------------------------------------------------------------------------------------------------------------------------------------------------------------------------------------------------------------------------------------------------------------------------------------------------------------------------------------------------------------------------------------------------------------------------------------------------------------------------------------------------------------------------------------------------------------------------------------------------------------------------------------------------------------------------------------------------------------------------------------------------------------------------------------------------------------------------------------------------------------------------------------------------------------------------------------------------------------------------------------------------------------------------------------------------------------------------------------------------------------------------------------------------------------------------------------------------------------------------------------------------------------------------------------------------------------------------------------------------------------------------------------------------------------------------------------------------------------------------------|---------|
| No.    | Query                                                                                                                                                                                                                                                                                                                                                                                                                                                                                                                                                                                                                                                                                                                                                                                                                                                                                                                                                                                                                                                                                                                                                                                                                                                                                                                                                                                                                                                                                                                                                                                                                                                                                                                                                                                                                                                                                                                                                                                                                                                                                                                                                                                                                                                                                                                                                                                                                                                                                                                                                                                                                                                                                                          | Results |
| S3     | (MH "Nebulizers and Vaporizers") OR TI (inhaler OR inhalers OR "asthma treatment" OR "asthma treatments" OR "asthma medication" OR "asthma medications" OR "asthma drug" OR "asthma drugs" OR "controller drug" OR "controller drugs" OR "controller medication" OR "controller medications" OR "asthma control" OR "asthma management" OR antiasthmatic OR antiasthmatics OR "anti asthmatic" OR "anti asthmatics" OR accolat OR advair OR aerobid OR albuterol OR aminophylline OR arformoterol OR asmanex OR azmacort OR beclomethasone OR benralizumab OR brethine OR budesonide OR cromolyn OR daliresp OR deltasone OR dexamethasone OR dulera OR dupilumab OR elixophyllin OR flovent OR flunisolide OR fluticasone OR foradil OR formoterol OR indacaterol OR intal OR lebrikizumab OR levalbuterol OR maxair OR medrol OR mepolizumab OR methylprednisolone OR mometasone OR montelukast OR nedocromil OR olodaterol OR omalizumab OR onbrez OR pediaped OR pirbuterol OR prednisolone OR prednisone OR proair OR procaterol OR proventil OR pulmicort OR qvar OR Roflumilast OR salmeterol OR SAR231893 OR serevent OR singularir OR spiriva OR symbicort OR terbutaline OR theolair OR theophylline OR tilade OR tiotropium OR tralokinumab OR triamcinolone OR uniphyll OR ventolin OR vilanterol OR xolair OR xopenex OR zafirlukast OR zileuton OR zyflo) OR AB (inhaler OR inhalers OR "asthma treatment" OR "asthma treatments" OR "asthma medication" OR "asthma medications" OR "asthma drug" OR "asthma drugs" OR "controller drug" OR "controller drugs" OR "controller medication" OR "controller medications" OR "asthma control" OR "asthma management" OR antiasthmatic OR antiasthmatics OR "anti asthmatic" OR "anti asthmatics" OR accolat OR advair OR aerobid OR albuterol OR aminophylline OR arformoterol OR asmanex OR azmacort OR beclomethasone OR benralizumab OR brethine OR budesonide OR cromolyn OR daliresp OR deltasone OR dexamethasone OR dulera OR dupilumab OR elixophyllin OR flovent OR flunisolide OR fluticasone OR foradil OR formoterol OR indacaterol OR intal OR lebrikizumab OR levalbuterol OR maxair OR medrol OR mepolizumab OR methylprednisolone OR mometasone OR montelukast OR nedocromil OR olodaterol OR omalizumab OR onbrez OR pediaped OR pirbuterol OR prednisolone OR prednisone OR proair OR procaterol OR proventil OR pulmicort OR qvar OR Roflumilast OR salmeterol OR SAR231893 OR serevent OR singularir OR spiriva OR symbicort OR terbutaline OR theolair OR theophylline OR tilade OR tiotropium OR tralokinumab OR triamcinolone OR uniphyll OR ventolin OR vilanterol OR xolair OR xopenex OR zafirlukast OR zileuton OR zyflo) | 19,265  |
| S4     | (MH "Patient Attitudes") OR TI ("patient attitude" OR adherence OR nonadherence OR "non adherence" OR comply OR compliance OR noncompliance OR "non compliance" OR satisfaction OR participation OR acceptance OR preference OR preferences OR attitude OR attitudes OR "self-management" OR barrier OR barriers OR belief OR beliefs OR enable OR enables OR enabler OR enablers OR facilitate OR facilitates OR facilitators OR perception OR perceptions OR perceive OR perceived OR misperception OR misperceptions OR misperceive OR misperceived) OR AB ("patient attitude" OR adherence OR nonadherence OR "non adherence" OR comply OR compliance OR noncompliance OR "non compliance" OR satisfaction OR participation OR preference OR preferences OR attitude OR attitudes OR "self-management" OR barrier OR barriers OR belief OR beliefs OR enable OR enables OR enabler OR enablers OR facilitate OR facilitates OR facilitators OR perception OR perceptions OR perceive OR perceived OR misperception OR misperceptions OR misperceive OR misperceived)                                                                                                                                                                                                                                                                                                                                                                                                                                                                                                                                                                                                                                                                                                                                                                                                                                                                                                                                                                                                                                                                                                                                                                                                                                                                                                                                                                                                                                                                                                                                                                                                                                       | 403,689 |
| S5     | S3 AND S4                                                                                                                                                                                                                                                                                                                                                                                                                                                                                                                                                                                                                                                                                                                                                                                                                                                                                                                                                                                                                                                                                                                                                                                                                                                                                                                                                                                                                                                                                                                                                                                                                                                                                                                                                                                                                                                                                                                                                                                                                                                                                                                                                                                                                                                                                                                                                                                                                                                                                                                                                                                                                                                                                                      | 1,947   |
| S6     | S2 OR S5                                                                                                                                                                                                                                                                                                                                                                                                                                                                                                                                                                                                                                                                                                                                                                                                                                                                                                                                                                                                                                                                                                                                                                                                                                                                                                                                                                                                                                                                                                                                                                                                                                                                                                                                                                                                                                                                                                                                                                                                                                                                                                                                                                                                                                                                                                                                                                                                                                                                                                                                                                                                                                                                                                       | 20,570  |
| S7     | S1 AND S6                                                                                                                                                                                                                                                                                                                                                                                                                                                                                                                                                                                                                                                                                                                                                                                                                                                                                                                                                                                                                                                                                                                                                                                                                                                                                                                                                                                                                                                                                                                                                                                                                                                                                                                                                                                                                                                                                                                                                                                                                                                                                                                                                                                                                                                                                                                                                                                                                                                                                                                                                                                                                                                                                                      | 1,737   |
| S8     | (MH "Qualitative Studies+") OR (MH "Interviews+") OR (MH "Observational Methods+") OR (MH "Surveys") OR (MH "Focus Groups") OR (MH "Audiorecording") OR (MH "Questionnaires+") OR TI ("semi-structured" OR semistructured OR unstructured OR informal OR "in-depth" OR indepth OR "face-to-face" OR structured OR interview OR interviews OR discussion OR discussions OR "focus group" OR "focus groups" OR qualitative OR ethnography OR ethnographic OR fieldwork OR "field work" OR "key informant" OR questionnaire OR questionnaires OR survey OR surveys OR surveyed OR "open-ended question" OR "open-ended questions" OR "thematic analysis" OR workshop OR workshops) OR AB ("semi-structured" OR semistructured OR unstructured OR informal OR "in-depth" OR indepth OR "face-to-face" OR structured OR interview OR interviews OR discussion OR discussions OR "focus group" OR "focus groups" OR qualitative OR ethnography OR ethnographic OR fieldwork OR "field work" OR "key informant" OR questionnaire OR questionnaires OR survey OR surveys OR surveyed OR "open-ended question" OR "open-ended questions" OR "thematic analysis" OR workshop OR workshops)                                                                                                                                                                                                                                                                                                                                                                                                                                                                                                                                                                                                                                                                                                                                                                                                                                                                                                                                                                                                                                                                                                                                                                                                                                                                                                                                                                                                                                                                                                                               | 714,799 |
| S9     | S7 AND S8<br>Limiters - English Language; Age Groups: All Adult                                                                                                                                                                                                                                                                                                                                                                                                                                                                                                                                                                                                                                                                                                                                                                                                                                                                                                                                                                                                                                                                                                                                                                                                                                                                                                                                                                                                                                                                                                                                                                                                                                                                                                                                                                                                                                                                                                                                                                                                                                                                                                                                                                                                                                                                                                                                                                                                                                                                                                                                                                                                                                                | 315     |
